# Supplementary material
Source: publisher figshare collection journal article supplement (https://acs.figshare.com/ndownloader/files/11876969)
Supplement: Supplementary file 1 [file 11876969]

# Supporting Information

## Self-Assembling Hollow Carbon Nanobeads into Double-Shell Microspheres as a Hierarchical Sulfur Host for Sustainable Room-Temperature Sodium-Sulfur Batteries

*Lei Zhang,<sup>‡12</sup> Binwei Zhang,<sup>‡2</sup> Yuhai Dou,<sup>‡1</sup> Yunxiao Wang,<sup>2</sup> Mohammad Al-Mamun,<sup>1</sup> Xianluo Hu,<sup>\*3</sup> Huakun Liu<sup>\*2</sup>*

1, Centre for Clean Environment and Energy, Gold Coast Campus, Griffith University, Gold Coast, QLD 4222, Australia.

2, Institute for Superconducting and Electronic Materials, University of Wollongong, Squires Way, North Wollongong, NSW 2500, Australia.

3, State Key Laboratory of Materials Processing and Die & Mould Technology, School of Materials Science and Engineering, Huazhong University of Science and Technology, Wuhan 430074, P.R. China.

\*To whom correspondence should be addressed. E-mail address: [hua@uow.edu.au](mailto:hua@uow.edu.au) (H. Liu)

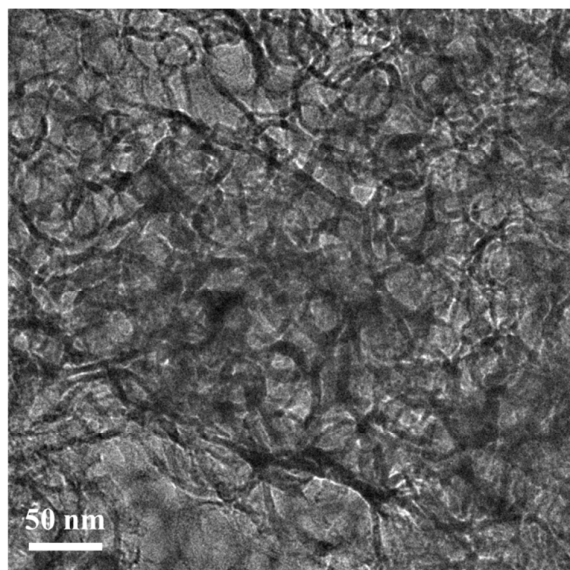

**Figure S1.** Morphology and structure of the inner part of PCMs.

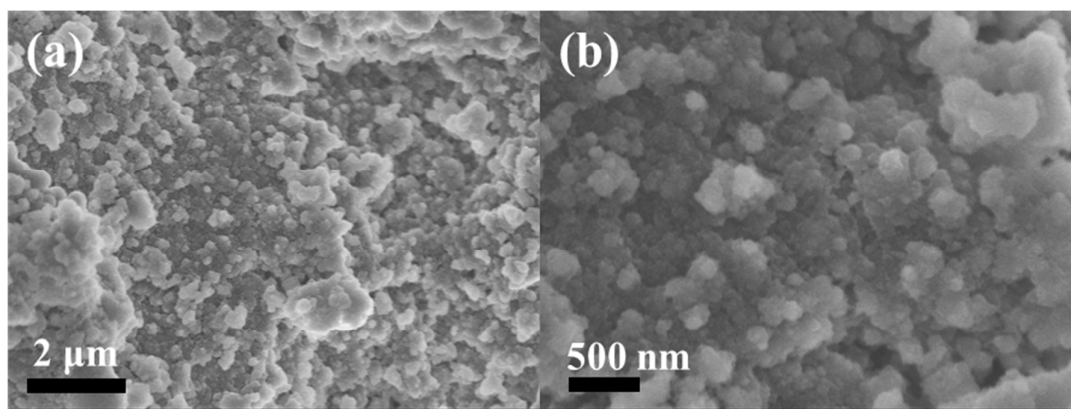

**Figure S2.** SEM images of PCMs-S after cycling test. (a) Low magnification and (b) high magnification.

**Table S1.** Charge resistance and solution resistance of PCMs-S and HCMs-S obtained from Nyquist Plots.

| Samples               | PCMs-S | HCMs-S |
|-----------------------|--------|--------|
| $R_{ct}$ ( $\Omega$ ) | 499    | 900    |
| $R_s$ ( $\Omega$ )    | 13     | 18     |

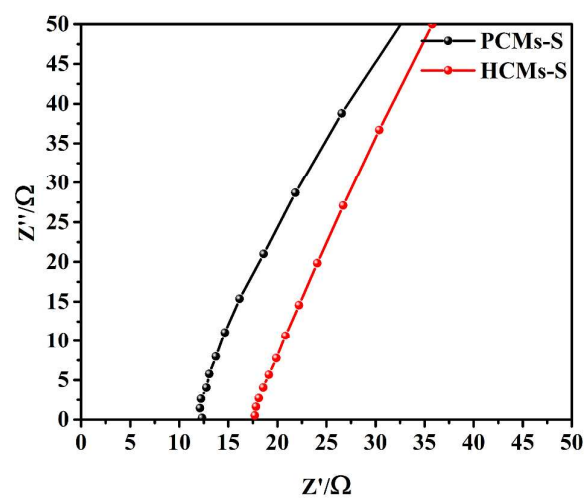

**Figure S3.** Enlarged EIS curves of the high frequency region for PCMs-S and HCMs-S composite.
